# Supplementary material
Source: publisher figshare collection journal article supplement (https://future-science-group.figshare.com/ndownloader/files/30833518)
Supplement: Supplementary file 1 [file 30833518]

**Supplementary Figure. Best Karnofsky Performance Scale Among ICU survivors1**

**a.** KPS2 Before ICU3 Admission vs. Best KPS after ICU Admission Among Survivors


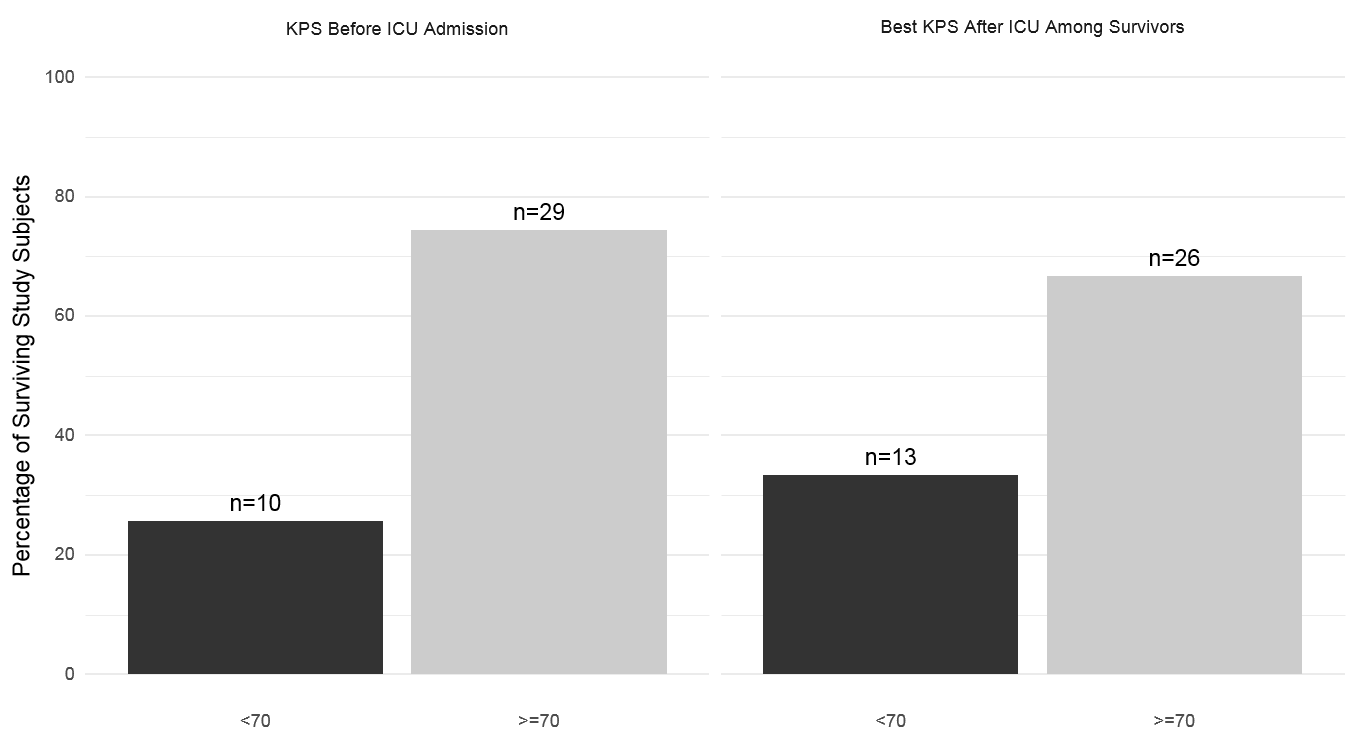


**b.**


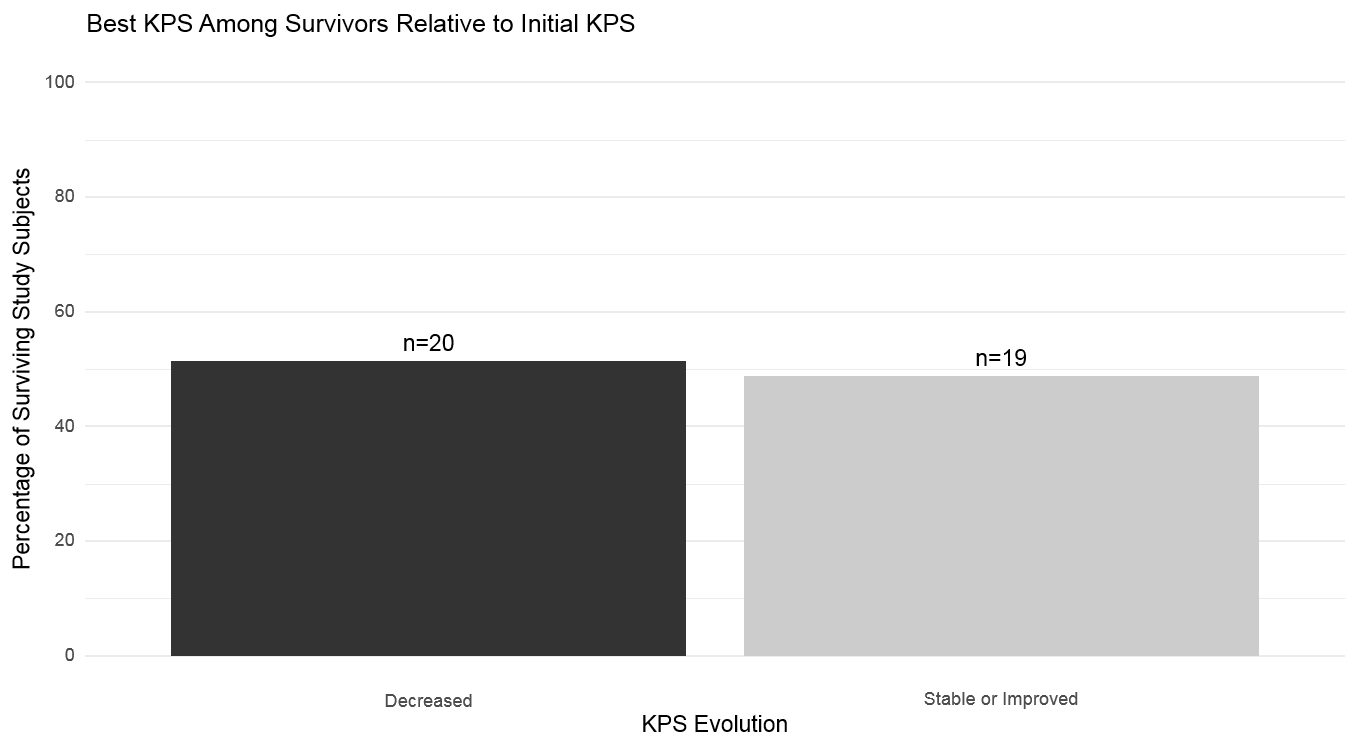


1within 6-month post-discharge period, 2KPS karnofsky performance scale, 3ICU intensive care unit
